# Supplementary material for: Divergent pathogenic dynamics of immature tick-borne and mosquito-borne flaviviruses: a paradigm shift in prM-containing particle infectivity
Source: Research Square preprint supplement (doi:10.21203/rs.3.rs-3918672/v1), 2024-07-15
Supplement: Supplementary file 1 [file 0b5cc9cb432b72acaf9fe4b9.pdf]

## Reporting Summary

Nature Portfolio wishes to improve the reproducibility of the work that we publish. This form provides structure for consistency and transparency in reporting. For further information on Nature Portfolio policies, see our [Editorial Policies](#) and the [Editorial Policy Checklist](#).

### Statistics

For all statistical analyses, confirm that the following items are present in the figure legend, table legend, main text, or Methods section.

n/a | Confirmed

- The exact sample size ( $n$ ) for each experimental group/condition, given as a discrete number and unit of measurement
- A statement on whether measurements were taken from distinct samples or whether the same sample was measured repeatedly
- The statistical test(s) used AND whether they are one- or two-sided  
*Only common tests should be described solely by name; describe more complex techniques in the Methods section.*
- A description of all covariates tested
- A description of any assumptions or corrections, such as tests of normality and adjustment for multiple comparisons
- A full description of the statistical parameters including central tendency (e.g. means) or other basic estimates (e.g. regression coefficient) AND variation (e.g. standard deviation) or associated estimates of uncertainty (e.g. confidence intervals)
- For null hypothesis testing, the test statistic (e.g.  $F$ ,  $t$ ,  $r$ ) with confidence intervals, effect sizes, degrees of freedom and  $P$  value noted  
*Give  $P$  values as exact values whenever suitable.*
- For Bayesian analysis, information on the choice of priors and Markov chain Monte Carlo settings
- For hierarchical and complex designs, identification of the appropriate level for tests and full reporting of outcomes
- Estimates of effect sizes (e.g. Cohen's  $d$ , Pearson's  $r$ ), indicating how they were calculated

*Our web collection on [statistics for biologists](#) contains articles on many of the points above.*

### Software and code

Policy information about [availability of computer code](#)

#### Data collection

LightCycler 480 Software, Version 1.5 (Roche)  
Olympus Xcellence software for acquisition of microscopy images.  
ImageXpress software for acquisition of microscopy images.  
Raw images from microscope were processed with ImageJ/Fiji software 1.53h.  
Enzymatic analysis were collected with Tecan Magellan software.  
Amersham™ Imager 680 (GE Healthcare).

#### Data analysis

Data were plotted into graphs and statistically analysed using GraphPad Prism software version 8.  
AlphaFold2 was used for structure predictions  
Structural analysis of models was performed in PyMOL 2.5.4.  
Clustal Omega and MAFFT were used for multiple sequence alignments  
iTOL online tool ([www.itol.embl.de](http://www.itol.embl.de)) was used for visualization of phylogenetic trees

For manuscripts utilizing custom algorithms or software that are central to the research but not yet described in published literature, software must be made available to editors and reviewers. We strongly encourage code deposition in a community repository (e.g. GitHub). See the Nature Portfolio [guidelines for submitting code & software](#) for further information.

## Data

Policy information about [availability of data](#)

All manuscripts must include a [data availability statement](#). This statement should provide the following information, where applicable:

- Accession codes, unique identifiers, or web links for publicly available datasets
- A description of any restrictions on data availability
- For clinical datasets or third party data, please ensure that the statement adheres to our [policy](#)

The authors declare that data supporting the findings of this study are available within the paper and its supplementary informations files. All other data are available from the corresponding author upon reasonable request. Published data were taken from GenBank ([www.ncbi.nlm.nih.gov/genbank](http://www.ncbi.nlm.nih.gov/genbank)), UniProt ([www.uniprot.org](http://www.uniprot.org)) and Protein Data Bank, PDB ([www.rcsb.org](http://www.rcsb.org)).

## Research involving human participants, their data, or biological material

Policy information about studies with [human participants or human data](#). See also policy information about [sex, gender \(identity/presentation\), and sexual orientation](#) and [race, ethnicity and racism](#).

|                                                                    |                                                                                |
|--------------------------------------------------------------------|--------------------------------------------------------------------------------|
| Reporting on sex and gender                                        | <input type="text" value="Our research does not involve human participants."/> |
| Reporting on race, ethnicity, or other socially relevant groupings | <input type="text" value="Our research does not involve human participants."/> |
| Population characteristics                                         | <input type="text" value="Our research does not involve human participants."/> |
| Recruitment                                                        | <input type="text" value="Our research does not involve human participants."/> |
| Ethics oversight                                                   | <input type="text" value="Our research does not involve human participants."/> |

Note that full information on the approval of the study protocol must also be provided in the manuscript.

## Field-specific reporting

Please select the one below that is the best fit for your research. If you are not sure, read the appropriate sections before making your selection.

- Life sciences       Behavioural & social sciences       Ecological, evolutionary & environmental sciences

For a reference copy of the document with all sections, see [nature.com/documents/nr-reporting-summary-flat.pdf](https://nature.com/documents/nr-reporting-summary-flat.pdf)

## Life sciences study design

All studies must disclose on these points even when the disclosure is negative.

|                 |                                                                                                                                                                                                 |
|-----------------|-------------------------------------------------------------------------------------------------------------------------------------------------------------------------------------------------|
| Sample size     | <input type="text" value="No sample-size calculation was performed. The sample sizes were chosen based on experience and minimal number of replicates needed for the statistical evaluation."/> |
| Data exclusions | <input type="text" value="No data were excluded."/>                                                                                                                                             |
| Replication     | <input type="text" value="Eperiments successfully repeated at least twice."/>                                                                                                                   |
| Randomization   | <input type="text" value="The mice were randomly assigned to cages and the cages were then randomized into groups."/>                                                                           |
| Blinding        | <input type="text" value="Blinding was not relevant to this study. The readouts of all experiments could be assessed objectively."/>                                                            |

## Reporting for specific materials, systems and methods

We require information from authors about some types of materials, experimental systems and methods used in many studies. Here, indicate whether each material, system or method listed is relevant to your study. If you are not sure if a list item applies to your research, read the appropriate section before selecting a response.

## Materials &amp; experimental systems

## Methods

- n/a  Involved in the study
- Antibodies
- Eukaryotic cell lines
- Palaeontology and archaeology
- Animals and other organisms
- Clinical data
- Dual use research of concern
- Plants

- n/a  Involved in the study
- ChIP-seq
- Flow cytometry
- MRI-based neuroimaging

## Antibodies

## Antibodies used

Anti-Flavivirus Group Antigen Antibody (E protein), clone D1-4G2-4-15 (1:250; Merck; MAB10216)  
 TBEV E protein antibody (mouse monoclonal antibody 1493, diluted 1:2000; PMID:7817895)  
 TBEV M protein antibody (in-house rabbit polyclonal serum, diluted 1:500)  
 Goat anti-Human IgG (H+L) Alexa Fluor™ 488 (1:1000; Thermofisher Scientific)  
 anti-mouse IgG-HRP (1:2500; Invitrogen AB\_228307)  
 anti-rabbit IgG-HRP (1:2500; Invitrogen AB\_228341)

## Validation

Anti-TBEV antibodies were previously reported and validated (PMID:7817895 and 35458522).  
 No validation statements for the other antibodies that are commercially available.

## Eukaryotic cell lines

Policy information about [cell lines and Sex and Gender in Research](#)

## Cell line source(s)

BHK-21 (ATCC CCL-10)  
 Vero cells (ATCC CCL-81)  
 LoVo cells (ATCC CCL-229)  
 Porcine kidney stable cells - PS (provided by the National Reference Laboratory for Cell Cultures, National Institute of Public Health, Prague)  
 Tick cell line IRE/CTVM19 (derived from Ixodes ricinus, provided by the Tick Cell Biobank, University of Liverpool, UK)

## Authentication

Not authenticated after purchase

## Mycoplasma contamination

In situ analysis never detected Mycoplasma infection.

Commonly misidentified lines  
(See [ICLAC](#) register)

No commonly misidentified cell line have been used in this study.

## Animals and other research organisms

Policy information about [studies involving animals](#); [ARRIVE guidelines](#) recommended for reporting animal research, and [Sex and Gender in Research](#)

## Laboratory animals

6-week-old BALB/c female mice (ENVIGO RMS) were housed in individually ventilated cages in the BSL-3 animal facility with controlled environment with a 12/12 hour light-dark cycle. Animals were fed the standard chow diet ad libitum. Water bottles with fresh drinking water were changed twice a week.

## Wild animals

The study did not involve wild animals.

## Reporting on sex

Only female mice were used in this study.

## Field-collected samples

This study did not involve field-collected samples.

## Ethics oversight

The animal experiments complied with all relevant European Union guidelines for work with animals and were carried out in accordance with Czech national law guidelines on the use of experimental animals and protection of animals against cruelty (Animal Welfare Act No. 246/1992 Coll.). The protocol was approved by the Committee on the Ethics of Animal Experimentation of the Institute of Parasitology and the Departmental Expert Committee for the Approval of Projects of Experiments on Animals of the Czech Academy of Sciences (permit no. 111/2020).

Note that full information on the approval of the study protocol must also be provided in the manuscript.

## Plants

---

Seed stocks

Our study does not involve plants or seeds.

Novel plant genotypes

Our study does not involve plants or seeds.

Authentication

Our study does not involve plants or seeds.
